# Supplementary material
Source: PubMed Central journal article supplement (PMC3147933)
Supplement: supp_85_15_7644__1.pdf [file supp_85_15_7644__1.pdf]

A

| species                             | amino acid alignment                                   | GenBank accession number |
|-------------------------------------|--------------------------------------------------------|--------------------------|
| <i>human herpesvirus 1</i>          | 398 -PAR <b>PRAAVAPCVR</b> APP-----PGPGPRAPAPG--- 424  | NC_001806                |
| <i>human herpesvirus 2</i>          | 406 RAAR <b>PRAAVAPRVRS</b> SPPRAAAAPVVSASADAAG--- 438 | NC_001798                |
| <i>macacine herpesvirus 1</i>       | 298 ---- <b>PVVPVAPRPR</b> ---PAAEPPAPAPGAAPRQPAH 326  | NC_004812                |
| <i>cercopithecine herpesvirus 2</i> | 254 ---- <b>PVAPVAPRPR</b> -----AAMPRPPAQARPP---A 277  | NC_006560                |
| <i>papiine herpesvirus 2</i>        | 323 VPVV <b>PVVPVAPRPR</b> VAAEAPAPPRPPAQARPPTTLT 358  | NC_007653                |

B

HSV-2 ICP0

| residues  | alignment           |
|-----------|---------------------|
| 311-322   | <b>PAVAAVVPRVAS</b> |
| 410-420   | <b>PR-AAVAPRVRS</b> |
| consensus | <b>Px-AxVxPxxR</b>  |

Supplemental Figure S1. SIAH-1 binding motif in ICP0 homologs of primate simplexesviruses.

```

HSV-1 MEPRPGASTRR---PEGRPQREP---APDVVWFPCDRDLPDSSDSEAEDEVGGRGDADH 53
HSV-2 MEPRPGTSSRADPGPERPPRQTPGTPAAPHAWGMLNDMQWLASSDSEEEDEVG-ISDDDL 59
*****:*:* ** *:: * **..* : * : ***** ***** .* *

HSV-1 HDDDSASEADSTDTELFETGLLGPQVDGG--AVSGGSPPREEDPGSCGGAPPRED--GG 109
HSV-2 HR-DSTSEAGSTDTEMFEAGLMDAATPPARPPAERQGSPTPADAQGGSCGGGPGVGEIEAEA 118
* **:*:**.*****:***:***:.. . * ***. : *****.* *: .

HSV-1 SDEGDVCAAVCTDEIAPHLRCDTFPCMHRFCIPCMKTWMQLRNTCPLCNAKLVYLIVGVTP 169
HSV-2 GGGGDVCAAVCTDEIAPPLRCQSFCLHPFCIPCMKTWIPLRNTCPLCNTPVAYLIVGVTA 178
.. ***** ***** **::***:* *****: *****: :.*****.

HSV-1 SGSFSTIPIVNDPQTRMEAEAEAVRAGTAVDFIWTGNQRFAAPRYLTLGGHTVRALSPTHPE 229
HSV-2 SGSFSTIPIVNDPRTVEAEAAVRAGTAVDFIWTGNPRTAPRSLSLGGHTVRALSPTPPW 238
*****:***:*** ***** ***** * *** *:***** *

HSV-1 PTTDEDDDDLDADYVPPAPRRTPRAPRRRGAAAPPVTGGASHAAPQPAARTAPPSAPI 289
HSV-2 PGTDEDDDLADVDYVPPAPRRAP----RRGGGG---AGATRGTSSQPAATRPAPPGAPR 290
* **::*** * .*****:* **.. . .**:::*****:*.***.*

HSV-1 GPHGSSNTNTTTNSSGGGSRQSRAAAPRGASGP--SGGVGVGVVVEAEAGRPRGRTP 347
HSV-2 SSSSGGAPLRAGVGSVGGGPAVAAVVPRVASLPPAAGGGRAQARRVGEDAAAAEGRTPP 350
.. . . . : .**.*. *..** ** * :** . . * :. .*** *

HSV-1 LVNRPAPLANNRDPIVIVSDSPASPFRPP-----AAPMPGSAPRPGPPASAAASG-P 398
HSV-2 AR---QPRAAQEPPIVIVSDSPPPSPRRPAGPGPLSFVSSSSAQVSSGPGGGGLPQSSGRA 407
* * :. *****.***:**. :. . :. ** . . :** .

HSV-1 ARPRAAVAPCVRAPP----PGPGPRAPAPGAEPAPARPADARRVPQSHSSLAQAANQEQS 453
HSV-2 ARPRAAVAPRVRSPPRAAAAPVVSASADAAGPAPPVVDHRAPRSRMTQAQTDTQAQS 467
***** **:* * .. * **.* ** *:**:*:*: : **:* * **

HSV-1 LCRARATVARGSGGPGVEGGHGPSRGAAPSGAAPLPSAASVEQEAAVRPRKRRGS----- 508
HSV-2 LGRAGATDARGSGGPGAEGGPGVPRGTNTPGAAPHAAEG----AAARPRKRRGSDSGPA 522
* * * * *****.*** * **:* ..***** :. . **.******

HSV-1 -GQENPSPQSTRPPLAP--AGAKRAATHPPSDSGPGGRGQG-----GPGTPLTS---- 554
HSV-2 ASSSASSAAPRSPLAPQGVGAKRAAPRRAPDSDSGDRGHGLAPASAGAAPPSPSSQ 582
... *. :.*.*** .*****: ..*****:** *...* :*

HSV-1 -----SAASASSSSASSSSAPTAGAASSAAG--AASSSASASSGGAVGALG-----GR 601
HSV-2 AAVAAAASSSSASSSSASSSSASSSSASSSSASSSSASSSSASSSAGGAGGSVASASGAGE 642
*:*:*****.:.:.*:**. *:*:**:*:** *:. *

HSV-1 QEETSLGPRAASGPRGPRKCARKTRHAETS---GAVPAGGLTRYLPISGVSSVVALSPY 657
HSV-2 RRETSLGPRAAA-PRGPRKCARKTRHAEGGPEPGARDPAPGLTRYLPVAGVSSVVALAPY 701
:.******: ***** . . ** *****:*****:**

HSV-1 VNKTITGDCLPILDMETGNIGAYVVLVDOTGNMATRLRAAVPGWSRRTLLPETAGNHVMP 717
HSV-2 VNKTITGDCLPVLDMETGHIGAYVVLVDQTNVADLLRAAAPAWSRRTLLPEHARNVVRP 761
****:*:**:*:**:*:**:*:**:*:**:* ***.***** * * * *

HSV-1 PEYPTAPASEWNSLWMTVPGNMLFDQGTLVGALDFRSLRSRHPWSGEQGASTRDEGKQ-- 775
HSV-2 PDYPTPPASEWNSLWMTVPGNMLFDQGTLVGALDFHGLRSRHPWSREQGAPAPAGDAPAG 821
*:*.*.*****:*****:*****.***** ***. : .

HSV-1 ---
HSV-2 HGE 824

```

Supplemental Figure S2. Complete Alignment of ICP0 homologues of HSV-1 and HSV-2.

SIAH-1\_Hs\_ MSRQTATALPTGT--SKCPPSQ-----RVPALTGTTAS--- 31  
 SIAH-2\_Hs\_ MSRPSSTGPSANKPCSKQPPPQPQHTPSPAAPPAAATISAAGPGSSAVPAAAAVISGPGG 60  
 \*\*\* :\*: . :... \*\* \*\*.\* \*\*\* :.. :.

SIAH-1\_Hs\_ -----NNDLASLFECVPCFDYVLPPIILQCQSGHLVCSNCRPKLTCCPTCRGPLG- 80  
 SIAH-2\_Hs\_ GGGAGPVSPQHHELTSLFECVPCFDYVLPPIILQCQAGHLVCNQCRLKLSCCPTCRGALTP 120  
 :\*: :\*:\*\*\*\*\*:\*\*\*\*\*.:\*\* \*\*\*:\*\*\*\*\*.\*

SIAH-1\_Hs\_ SIRNLAMEKVANSVLFPCKYASSGCEITLPHTEKADHEELCEFRPYSCPCPGASCKWQGS 140  
 SIAH-2\_Hs\_ SIRNLAMEKVASAVLFPCKYATTGCSLTLHHTEKPEHEDICEYRPYSCPCPGASCKWQGS 180  
 \*\*\*\*\*.:\*\*\*\*\*:\*. :\*\* \*\*\*\*\*.:\*\* :\*:\*\*\*\*\*

SIAH-1\_Hs\_ **LD**AVMPHLMHQHKS**ITTL**QGEDIV**F**LATDINLPGAVDW**MM**QSCFGHFMLVLEKQEKYD 200  
 SIAH-2\_Hs\_ **LE**AVM**SH**LMHAHKS**ITTL**QGEDIV**F**LATDINLPGAVDW**MM**QSCF**G**H**H**FMLVLEKQEKYE 240  
 \* :\*\*\*.\*\*\* \*\*\*\*\*.\*\*\*\*\*.\*\*\*\*\*:

SIAH-1\_Hs\_ **GH**Q**Q**FFAIV**Q**LIGTRK**Q**AENFAYRLELNGHRRRLTWEATPRSIHEGIATAIMNSDCLVFD 260  
 SIAH-2\_Hs\_ **GH**Q**Q**FFAIV**L**LIGTRK**Q**AENFAYRLELNGNRRLTWEATPRSIHDGVAAAIMNSDCLVFD 300  
 \*\*\*\*\* \*\*\*\*\*:\*\*\*\*\*:\*. :\*:\*\*\*\*\*

SIAH-1\_Hs\_ **TS**IA**Q**LFAENGLGINVT**IS**MC-- 282  
 SIAH-2\_Hs\_ TAI**A**HL**F**ADNGNLGINVT**IS**TCCP 324  
 \* :\*:\*\*\*:\*\*\*\*\* \*
